# Supplementary material for: The Influence of Edaphic Factors on DNA Damage and Repair in Wild Wheat Triticum dicoccoides Körn. (Poaceae, Triticeae)
Source: MDPI journal article supplement (doi:10.3390/ijms24076847), 2023-04-06
Supplement: s1 [file s1]

**Table S1.** Numbers of clusters of RAD51, LigIV,  $\gamma$ H2AX, RNAPII, and S9.6 detected on single metaphase chromosome plates in individual plants.

\* RNAPII and S9.6 clusters were counted together with  $\gamma$ H2AX clusters on the same cytological slide.

\*\*NC – Non-checked.

| Genotype       | Plate No. | Number of clusters per single chromosome plate |             |               |            |            |
|----------------|-----------|------------------------------------------------|-------------|---------------|------------|------------|
|                |           | RAD51                                          | LigIV       | $\gamma$ H2AX | RNAPII *   | S9.6 *     |
| <b>B26</b>     | 1         | 65                                             | 37          | 127           | NC         | NC**       |
|                | 2         | 62                                             | 43          | 149           | NC         | NC         |
|                | 3         | 54                                             | 26          | 184           | NC         | NC         |
|                | 4         | 60                                             | 76          | 185           | NC         | NC         |
|                | 5         | 69                                             | 40          | 140           | NC         | NC         |
|                | 6         | 57                                             | 44          | 109           | NC         | NC         |
|                | 7         | 67                                             | 36          | 101           | NC         | NC         |
|                | 8         | 58                                             | 75          | 124           | NC         | NC         |
|                | 9         | 59                                             | 61          | 148           | NC         | NC         |
|                | 10        | 58                                             | 35          | 102           | NC         | NC         |
| <b>average</b> |           | <b>60.9</b>                                    | <b>47.3</b> | <b>136.9</b>  | NC         | NC         |
| <b>SE</b>      |           | $\pm 4.8$                                      | $\pm 17.3$  | $\pm 30.5$    | NC         | NC         |
| <b>B60</b>     | 1         | 85                                             | 99          | 115           | NC         | NC         |
|                | 2         | 115                                            | 86          | 102           | NC         | NC         |
|                | 3         | 99                                             | 50          | 103           | NC         | NC         |
|                | 4         | 112                                            | 60          | 90            | NC         | NC         |
|                | 5         | 88                                             | 69          | 93            | NC         | NC         |
|                | 6         | 92                                             | 55          | 110           | NC         | NC         |
|                | 7         | 114                                            | 81          | 124           | NC         | NC         |
|                | 8         | 98                                             | 62          | 117           | NC         | NC         |
|                | 9         | 75                                             | 82          | 85            | NC         | NC         |
|                | 10        | 92                                             | 56          | 130           | NC         | NC         |
|                | 11        |                                                | 94          |               | NC         | NC         |
| <b>average</b> |           | <b>97.0</b>                                    | <b>72.2</b> | <b>106.9</b>  |            |            |
| <b>SE</b>      |           | $\pm 13.3$                                     | $\pm 16.9$  | $\pm 14.9$    |            |            |
| <b>B70</b>     | 1         | 58                                             | 51          | 63            | 5          | 2          |
|                | 2         | 59                                             | 55          | 64            | 4          | 0          |
|                | 3         | 36                                             | 48          | 68            | 4          | 0          |
|                | 4         | 42                                             | 52          | 75            | 4          | 0          |
|                | 5         | 96                                             | 66          | 83            | 5          | 1          |
|                | 6         | 92                                             | 56          | 84            | 4          | 2          |
|                | 7         | 37                                             | 63          | 85            | 5          | 0          |
|                | 8         | 95                                             | 70          | 86            | 6          | 0          |
|                | 9         | 59                                             | 75          | 96            | 4          | 1          |
|                | 10        | 61                                             | 50          | 127           | 4          | 2          |
| <b>average</b> |           | <b>63.5</b>                                    | <b>58.6</b> | <b>83.1</b>   | <b>4.5</b> | <b>0.8</b> |
| <b>SE</b>      |           | $\pm 23.2$                                     | $\pm 9.3$   | $\pm 18.8$    | $\pm 0.7$  | $\pm 0.9$  |
| <b>B81</b>     | 1         | 73                                             | 108         | 73            | 1          | 1          |
|                | 2         | 45                                             | 109         | 73            | 2          | 2          |

|                |    |             |              |              |            |            |
|----------------|----|-------------|--------------|--------------|------------|------------|
|                | 3  | 44          | 116          | 51           | 3          | 1          |
|                | 4  | 69          | 108          | 48           | 5          | 4          |
|                | 5  | 53          | 110          | 60           | 4          | 3          |
|                | 6  | 64          | 128          | 50           | 7          | 5          |
|                | 7  | 51          | 148          | 57           | 4          | 2          |
|                | 8  | 61          | 187          | 71           | 8          | 8          |
|                | 9  | 55          | 126          | 76           | 2          | 0          |
|                | 10 | 48          | 134          | 52           | 1          | 1          |
| <b>average</b> |    | <b>56.3</b> | <b>127.4</b> | <b>61.1</b>  | <b>3.7</b> | <b>2.7</b> |
| <b>SE</b>      |    | $\pm 10.1$  | $\pm 24.8$   | $\pm 11.1$   | $\pm 2.4$  | $\pm 2.3$  |
| <b>B91</b>     | 1  | 78          | 85           | 72           | NC         | NC         |
|                | 2  | 40          | 96           | 69           | NC         | NC         |
|                | 3  | 46          | 82           | 107          | NC         | NC         |
|                | 4  | 45          | 105          | 58           | NC         | NC         |
|                | 5  | 74          | 100          | 82           | NC         | NC         |
|                | 6  | 70          | 134          | 82           | NC         | NC         |
|                | 7  | 34          | 159          | 89           | NC         | NC         |
|                | 8  | 69          | 163          | 49           | NC         | NC         |
|                | 9  | 53          | 156          | 54           | NC         | NC         |
|                | 10 | 62          | 156          | 39           | NC         | NC         |
| <b>average</b> |    | <b>57.1</b> | <b>123.6</b> | <b>70.1</b>  |            |            |
| <b>SE</b>      |    | $\pm 15.5$  | $\pm 33.2$   | $\pm 20.6$   |            |            |
| <b>TR34</b>    | 1  | 61          | 69           | 146          | 6          | 4          |
|                | 2  | 73          | 53           | 164          | 7          | 0          |
|                | 3  | 68          | 57           | 97           | 7          | 0          |
|                | 4  | 84          | 57           | 113          | 6          | 0          |
|                | 5  | 76          | 63           | 97           | 0          | 5          |
|                | 6  | 82          | 65           | 94           | 2          | 0          |
|                | 7  | 75          | 49           | 123          | 5          | 2          |
|                | 8  | 77          | 61           | 96           | 0          | 2          |
|                | 9  | 72          | 47           | 98           | 6          | 0          |
|                | 10 | 71          | 48           | 243          | 6          | 2          |
|                | 11 | 63          | 56           |              |            |            |
| <b>average</b> |    | <b>72.9</b> | <b>56.8</b>  | <b>127.1</b> | <b>4.5</b> | <b>1.5</b> |
| <b>SE</b>      |    | $\pm 7.1$   | $\pm 7.2$    | $\pm 47.2$   | $\pm 2.8$  | $\pm 1.8$  |
| <b>TR43</b>    | 1  | 58          | 89           | 114          | NC         | NC         |
|                | 2  | 64          | 59           | 74           | NC         | NC         |
|                | 3  | 62          | 77           | 69           | NC         | NC         |
|                | 4  | 58          | 82           | 87           | NC         | NC         |
|                | 5  | 59          | 64           | 77           | NC         | NC         |
|                | 6  | 90          | 56           | 110          | NC         | NC         |
|                | 7  | 87          | 87           | 131          | NC         | NC         |
|                | 8  | 88          | 124          | 106          | NC         | NC         |
|                | 9  | 77          | 141          | 105          | NC         | NC         |
|                | 10 | 75          | 112          | 109          | NC         | NC         |
| <b>average</b> |    | <b>71.8</b> | <b>89.1</b>  | <b>98.2</b>  |            |            |

| SE             |    | ±13.2       | ±28.4        | ±20.3        |            |            |
|----------------|----|-------------|--------------|--------------|------------|------------|
| <b>TR52</b>    | 1  | 84          | 78           | 79           | 7          | 5          |
|                | 2  | 63          | 36           | 105          | 7          | 6          |
|                | 3  | 69          | 57           | 107          | 3          | 2          |
|                | 4  | 69          | 53           | 108          | 6          | 1          |
|                | 5  | 70          | 52           | 110          | 2          | 4          |
|                | 6  | 53          | 53           | 115          | 7          | 3          |
|                | 7  | 64          | 52           | 118          | 7          | 7          |
|                | 8  | 55          | 62           | 129          | 5          | 0          |
|                | 9  | 81          | 49           | 125          | 2          | 1          |
|                | 10 | 66          | 53           | 135          | 8          | 2          |
|                | 11 |             |              | 178          | 8          | 4          |
| <b>average</b> |    | <b>67.4</b> | <b>54.5</b>  | <b>119.0</b> | <b>5.6</b> | <b>3.2</b> |
| SE             |    | ±9.8        | ±10.6        | ±24.6        | ±2.3       | ±2.2       |
| <b>TR67</b>    | 1  | 38          | 61           | 81           | NC         | NC         |
|                | 2  | 56          | 49           | 60           | NC         | NC         |
|                | 3  | 52          | 76           | 131          | NC         | NC         |
|                | 4  | 60          | 67           | 88           | NC         | NC         |
|                | 5  | 28          | 86           | 99           | NC         | NC         |
|                | 6  | 46          | 82           | 109          | NC         | NC         |
|                | 7  | 75          | 95           | 86           | NC         | NC         |
|                | 8  | 52          | 116          | 152          | NC         | NC         |
|                | 9  | 71          | 86           | 99           | NC         | NC         |
|                | 10 | 66          | 97           | 113          | NC         | NC         |
| <b>average</b> |    | <b>54.4</b> | <b>81.5</b>  | <b>101.8</b> |            |            |
| SE             |    | ±14.6       | ±19.4        | ±26.2        |            |            |
| <b>TR82</b>    | 1  | 84          | 104          | 90           | 12         | 6          |
|                | 2  | 40          | 136          | 100          | 8          | 10         |
|                | 3  | 64          | 99           | 106          | 6          | 6          |
|                | 4  | 60          | 79           | 198          | 15         | 8          |
|                | 5  | 60          | 92           | 143          | 6          | 5          |
|                | 6  | 40          | 138          | 106          | 8          | 8          |
|                | 7  | 50          | 127          | 118          | 6          | 2          |
|                | 8  | 57          | 91           | 134          | 18         | 6          |
|                | 9  | 57          | 136          | 114          | 6          | 9          |
|                | 10 | 54          | 111          | 118          | 6          | 4          |
| <b>average</b> |    | <b>56.6</b> | <b>111.3</b> | <b>122.7</b> | <b>9.1</b> | <b>6.4</b> |
| SE             |    | ±12.6       | ±22.9        | ±30.7        | ±4.4       | ±2.4       |

**Table S2.** Primer combinations for real-time quantitative PCR.

| No. |                | Sequence              | NCBI Reference Sequence |
|-----|----------------|-----------------------|-------------------------|
| 1.  | <b>Actin-F</b> | AGATGATGCACCAAGGGCTG  | XM_037590498.1          |
| 2.  | <b>Actin-R</b> | CCCCATCCCTACCATGACAC  |                         |
| 3.  | <b>MRE11-F</b> | GGACGCAGCGAACGAAGTAA  | XM_037623921.1          |
| 4.  | <b>MRE11-R</b> | TTTCCGTCCACTTTGTGGGA  |                         |
| 5.  | <b>KU70-F</b>  | GATTGGGCAGACCTTGCAGA  | XM_037583509.1          |
| 6.  | <b>KU70-R</b>  | GCGCCGACAGGTAAGTTTTC  |                         |
| 7.  | <b>LigIV-F</b> | ACAAAGATCTGGCCGACGAG  | XM_037631088.1          |
| 8.  | <b>LigIV-R</b> | CATACATGCTACCCCGAGCC  |                         |
| 9.  | <b>RAD51-F</b> | CGAGCACCTCCAGGCATCT   | XM_037612996.1          |
| 10. | <b>RAD51-R</b> | CTCCACTGTGCAAAGACCAGC |                         |
| 11. | <b>BRCA1-F</b> | AAATGTGCTTGCTGCGGAGT  | XM_037565827.1          |
| 12. | <b>BRCA1-R</b> | TGAAGTGGAAGCTTTTGCGAC |                         |
| 13. | <b>MSH2-F</b>  | TGCATACAGCCACTGATCTGG | XM_037548313.1          |
| 14. | <b>MSH2-R</b>  | AACACATGTCCAAATGGGCC  |                         |
| 15. | <b>MLH1-F</b>  | ACACCCCTGATATGGATCGC  | XM_037603461.1          |
| 16. | <b>MLH1-R</b>  | TCTTTCTCAACGTCCCAGGC  |                         |
